# Supplementary material
Source: HighWire-hosted journal article supplement (https://bmjopen.bmj.com/content/12/9/e064542)
Supplement: inline-supplementary-material-2 [file inline-supplementary-material-2.pdf]

**Supplementary File 2.**

**Project title:** A qualitative exploration of SARS-CoV-2 community testing in Derbyshire: a formative process evaluation of those attending and not attending

**Interview Guide – ‘Attenders’ and ‘Non-attenders’**

**Introduction**

- Thank you for agreeing to take part in the evaluation.
- Review the purpose of the study in general:
  - Interested in hearing about if you have attended a COVID-19 community testing site in your area.
  - If attended, what did you think to the experience?
  - If not attended, any reasons/barrier for not going to get tested?
  - Make participant aware we are interviewing both those who attend and do not attend as part of the overall evaluation.
- Statement on confidentiality, right to withdraw, recording of the telephone interview.
- Ask if the participants have any questions before starting the interview and that they are still happy to continue.
- Take verbal consent.

**Attenders****Background/ before attending**

1. Could you tell me how you first find out about the COVID-19 community testing site running in your area?

- Have you seen it being advertised/promoted elsewhere?
- Who did you think the testing site were aimed at – who could attend? Asymptomatic? Any eligibility?

2. Why do you think community testing is currently running throughout the UK?

- What is the aim of community testing?
- Specifically in certain areas Derbyshire?

**Experience of attending a community testing site**

3. How many times have you visited a COVID-19 community testing site?

If more than one visit:

- How many times have you visited in the past? How regularly?
- Where they all at the same location?

4. What made you attend a community testing site?

- On your first occasion or subsequent occasions? If work – is this a requirement of your role?
- Were the reasons always the same?
- Was there anything you were worried/concerned about prior to your first visits?

5. Thinking about your most recent visit to [Name] community testing site (when I met you, on DAY/TIME). Could you briefly take me through what happened during this visit – from the time you arrived to the time you left?

- Organisation – location /signage/parking/how well was it run/waiting times or queues
- Information – was it clear / did you understand where you needed to go and when/ how long the process would take/ how long it would take to get your result and how you would find out/understanding of repeat attendance
- The COVID-19 safety measures in place/were they adhered to
- The staff members you came into contact with?
- Taking the COVID-19 lateral flow test?
- How long did the process take? Inside the testing site and until you received your result?
- If attended before: was your most recent experience similar or different to the other times you've attended a test site?
- Was the experience what you had expected/did anything happen they were not prepared for?

**Result of their most recent test**

6. Do you mind me asking, what was the result of your most recent test?

*If negative:*

- How did that make you feel?
- If you had had a positive result, how do you think that would have affected you? - your day to day life/family/work
- Have you ever tested positive for COVID-19 before? How long ago? How did you find out – booked test/community testing site? *Take them through 'if positive' questions below...*

*If positive:*

- Having been told of the positive result what happened next?
- Did you hear from anyone on the track and trace team – did they follow you up, how often, how long for, how did you find this?
- Did you self-isolate? For how many days? Did other people you live with self-isolate too? Any reasons why they could not self-isolate?
- Was there any other impact of a positive result - day to day life/family/work and income

**Reflections**

7. What do you think the test site you visited does well? Or should continue to do to?

8. Is there anything you feel the testing site could improve upon in the future?

- Could you think of how these improvements could be made?

9. Do you know of any reasons why other people might not want/barriers to attending community testing site?

- Have you heard this/or any other reason from other people you know as to why they do not want to attend?
- Increase attendance?

10. Will you be going back to be tested again in the near future? – *if testing site stopped running, hypothetically.*

- If yes, why?
- If not, why not?

12. Is there anything related to COVID-19 community testing sites that we have not spoken about but feel is important to mention before we finish?

**Closing remarks**

- Do you have any questions for me before we end the interview?
- Check demographic questions answered
- Thank you for your time
- Arrangement of inconvenience allowance/retail voucher

**Non-attenders**

1. Have you heard about the COVID-19 community testing site (for people without symptoms) running in your area?

- Have you seen them being advertised/promoted anywhere?
- Who did you think can attend community testing sites – could you attend?

2. Why do you think community testing are currently running throughout the UK?

- What is the aim of community testing?
- Specifically in certain areas Derbyshire?

3. Have you ever thought about attending a community testing site in your area?

- If yes, what has stopped you attending in the past?
- If not, are there any reasons for not wanting to attend?
- Do you know where your nearest community testing site is? What do you think of where it is located – access wise?

4. Do you know anyone who has attended a community testing site?

- Did they tell you about their experience? Positive/negative? Their reason for attending

5. Could anything be done to support/motivate you to attending a community testing site in the future?

- Could they provide any examples of what could be done?

6. Do you know of any reasons why other people might not want/barrier to attending community testing site?

- Have you heard this/or any other reason from other people you know as to why they do not want to attend?
- Increasing attendance?

7. Would you attend/go for a test at a community testing sites in the future?

- If yes, why under what circumstances
- If no, why not?

8. Have you ever tested positive for COVID-19 before? How long ago? How did you find out – booked test/community testing site? *Take them through 'if positive' questions below...*

*If positive:*

- Having been told of the positive result what happened next?
- Did you hear from anyone on the track and trace team – did they follow you up, how often, how long for, how did you find this?
- Did you name all those you had recently been in contact with? Do you know if they were followed up?
- Did you self isolate? For how many days? Did other people you live with self isolate too?
- Was there any other impact of a positive result - day to day life/family/work and income

9. Is there anything related to COVID-19 community testing sites that we have not spoken about but feel is important to mention before we finish?

Impact of vaccine...

#### **Closing remarks**

- Do you have any questions for me before we end the interview?
- Check demographic questions answered
- Thank you for your time
- Arrangement of inconvenience allowance/retail voucher
